# Supplementary material for: A Multicentric prospective Real-World Experience of Direct Oral Anticoagulants use in prophylaxis of Venous Thromboembolism in Nephrotic syndrome
Source: Research Square preprint supplement (doi:10.21203/rs.3.rs-8231240/v1), 2025-12-16
Supplement: Supplementary file 1 [file 70bff5b759292c165cf0f16a.pdf]

## **Annexure 1 : List of included centres**

1. Principal investigator: Priti Meena

All India institute of medical sciences-Bhubaneswar

Bhubaneswar, Odisha, India 751019

2. Principal investigator: Sharon Kandari

AIIMS, Rishikesh, Uttarakhand, India

3. Principal investigator: Ganesh Srinivasa Prasad

Department of Nephrology, Narayana Health, Bengaluru India

4. Principal investigator: Dr Vinant Bhargava

Sir Ganga Ram hospital New Delhi, India

5. Principal investigator: Vikash Khandelua

Govt Medical College Rangbari Road ,Kota , Rajasthan

Pin 324005

6. Principal investigator: Prashant Malviya

Sharda superspeciality hospital

Shastri nagar, Akola 444001

Maharashtra

7. Principal investigator: Nikunj Kishore Rout

KIMS & PBM Hospital

Bhubaneswar, Odisha, India 751019

8. Principal investigator: Nitin Kumar Manipal Hospitals Patiala, Punjab , India, 147001

drnknephro@gmail.com
